# Supplementary material
Source: PubMed Central journal article supplement (PMC7506467)
Supplement: NIHMS1624218-supplement-Supplement1.pdf [file NIHMS1624218-supplement-Supplement1.pdf]

## Supplementary Appendix

This appendix has been provided by the authors to give readers additional information about their work.

Supplement to: Drilon A, Oxnard GR, Tan DSW, et al. Efficacy of selpercatinib in *RET* fusion–positive non–small-cell lung cancer. *N Engl J Med* 2020;383:813-24. DOI: 10.1056/NEJMoa2005653

**Efficacy of Selpercatinib in *RET* Fusion-Positive Non-Small Cell Lung  
Cancer** Drilon A, Oxnard GR, Tan DSW, et al.

**SUPPLEMENTARY APPENDIX**

| <b>Contents</b> | <b>Page number</b> |
|-----------------|--------------------|
| Figure S1       | 2                  |
| Figure S2       | 3                  |
| Figure S3       | 4                  |
| Figure S4       | 5                  |
| Figure S5       | 6                  |
| Figure S6       | 7                  |
| Table S1        | 8                  |
| Table S2        | 9                  |
| Table S3        | 11                 |
| Table S4        | 12                 |
| Table S5        | 13                 |

**Figure S1: LIBRETTO–001 trial profile**

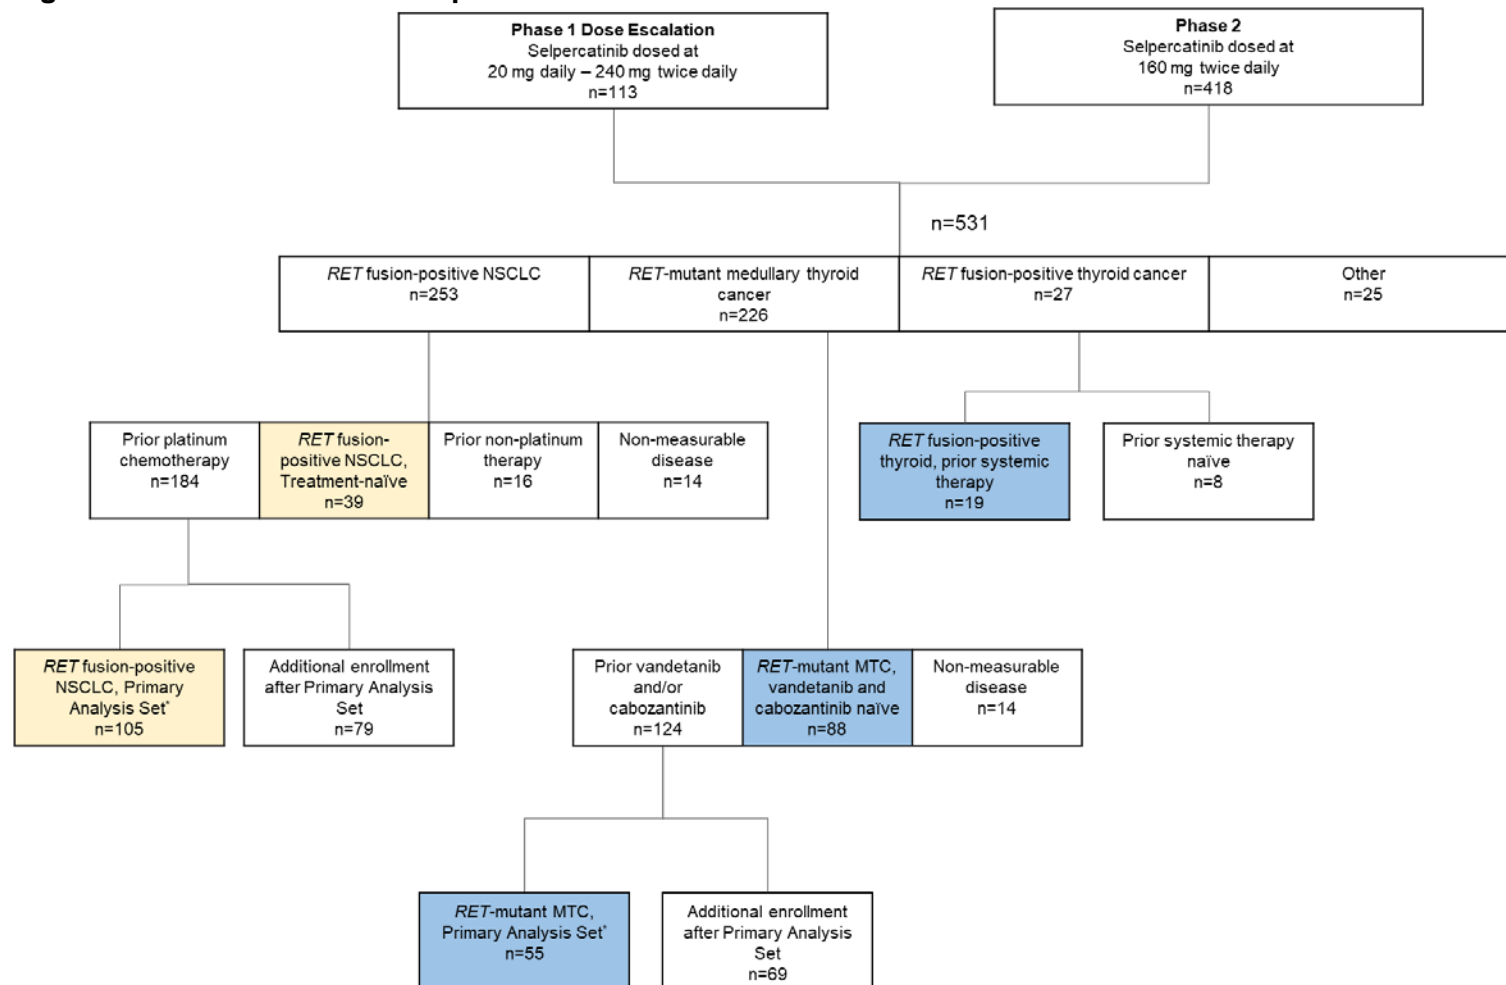

\*Per agreement with FDA, primary analysis sets defined as first consecutively treated 55 patients with RET-mutant vandetanib and/or cabozantinib previously-treated MTC and first consecutively treated 105 RET fusion-positive platinum-chemotherapy treated NSCLC. Primary analysis set established to ensure adequate selpercatinib treatment follow-up. Per agreement with FDA, patients with non-measurable disease at baseline enrolled during phase 1 dose escalation, but not the phase 2, were eligible for the primary analysis set.

**Figure S2: Waterfall Plots of the Maximum Change in Tumor Size in Platinum-chemotherapy Pretreated (n=105) and Treatment-naïve patients (n=39) as assessed by blinded independent review committee.** For each patient, the best (minimum) percent change from baseline in the sum of diameters for all target lesions is represented by a vertical bar. (A) platinum-chemotherapy pretreated patients; five patients are not shown as 2 had non-target lesions only, and 3 had no post-baseline target lesion measurement. (B) intracranial tumor response in evaluable platinum-chemotherapy pretreated patients with measurable CNS lesions. (C) treatment naïve patients.

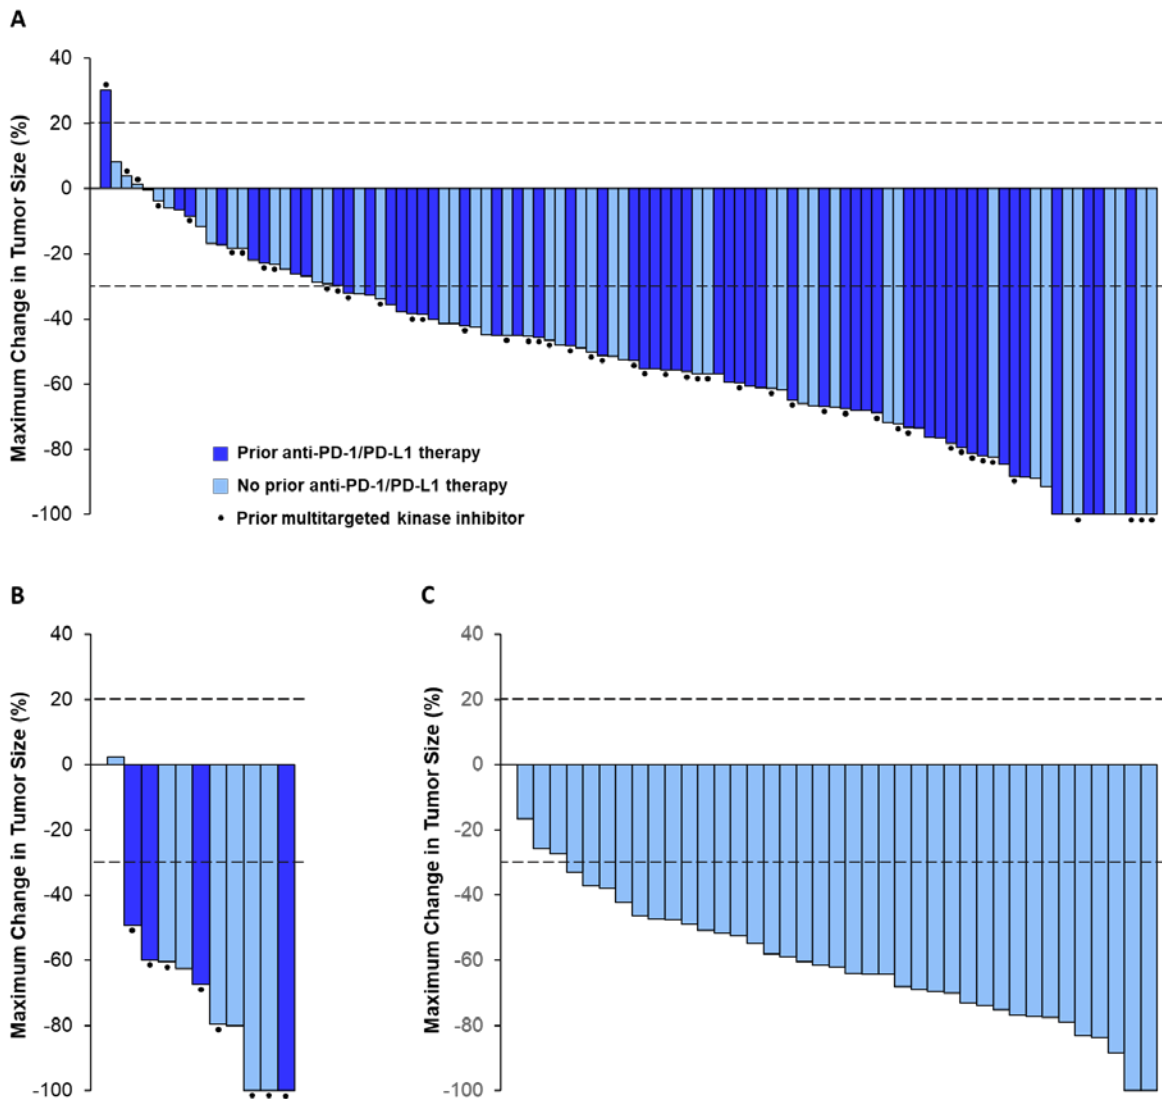

**Figure S3: Kaplan-Meier Plots of Duration of Response and Progression-free Survival among Platinum-chemotherapy pretreated Patients as assessed by blinded independent review committee.**

Kaplan-Meier plots of (A) duration of response among 67 of 105 patients with a confirmed response, and (B) progression-free survival among all 105 patients in the platinum-chemotherapy pretreated group.

A.

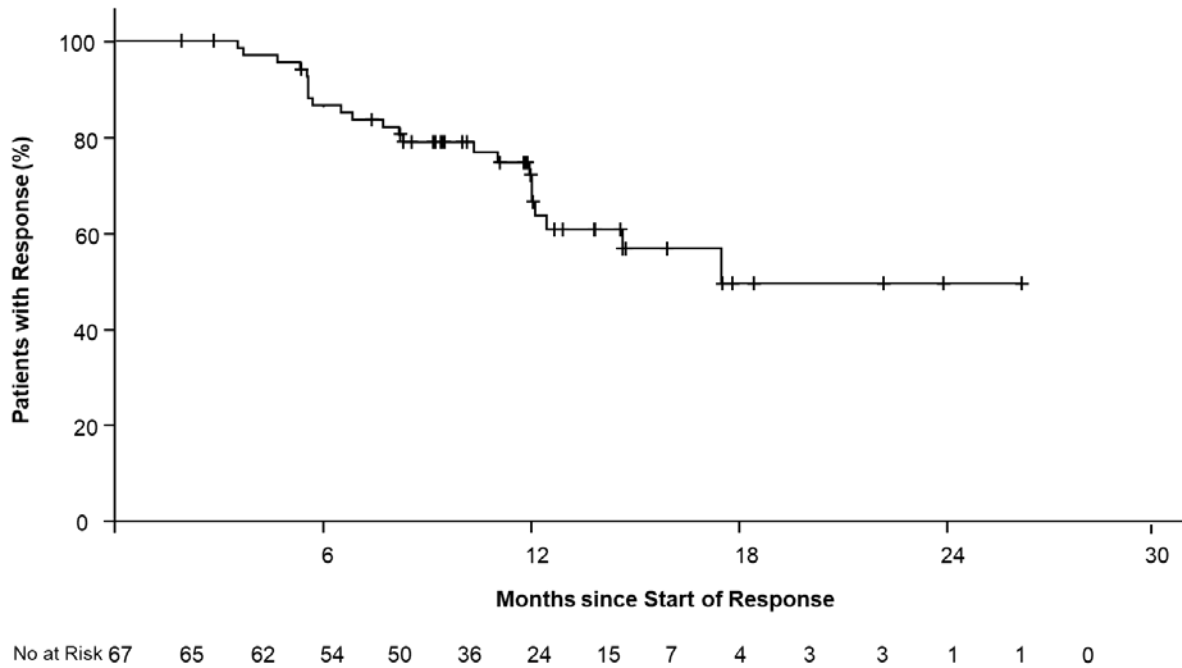

B.

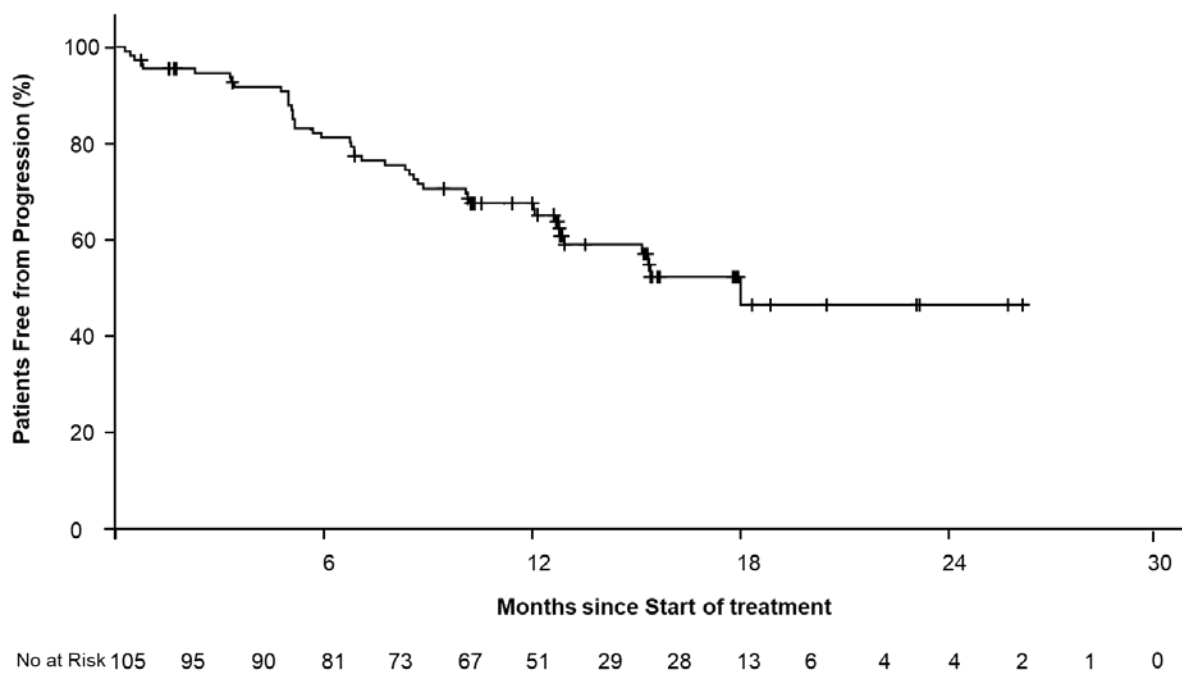

**Figure S4: Waterfall Plot of the Maximum Change in Tumor Size in Platinum-chemotherapy Pretreated Patients (n=105) by fusion partner per investigator assessment.** For each patient, the best (minimum) percent change from baseline in the sum of diameters for all target lesions is represented by a vertical bar. Data for five patients are not shown as one had non-target lesions only, and four had no post-baseline target lesion measurement.

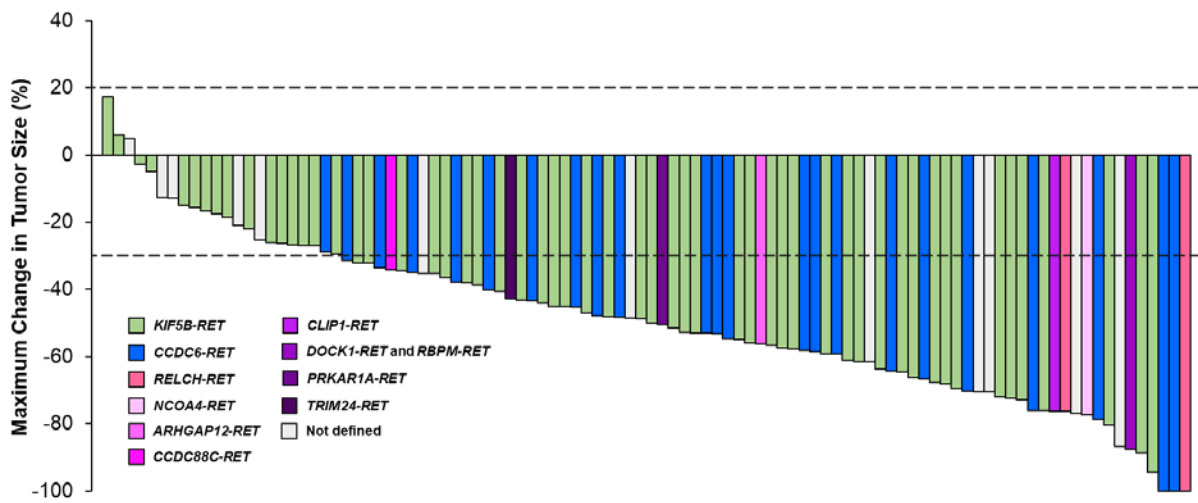

Figure S5: Outcomes in Platinum-chemotherapy Pretreated Patients (n=105).

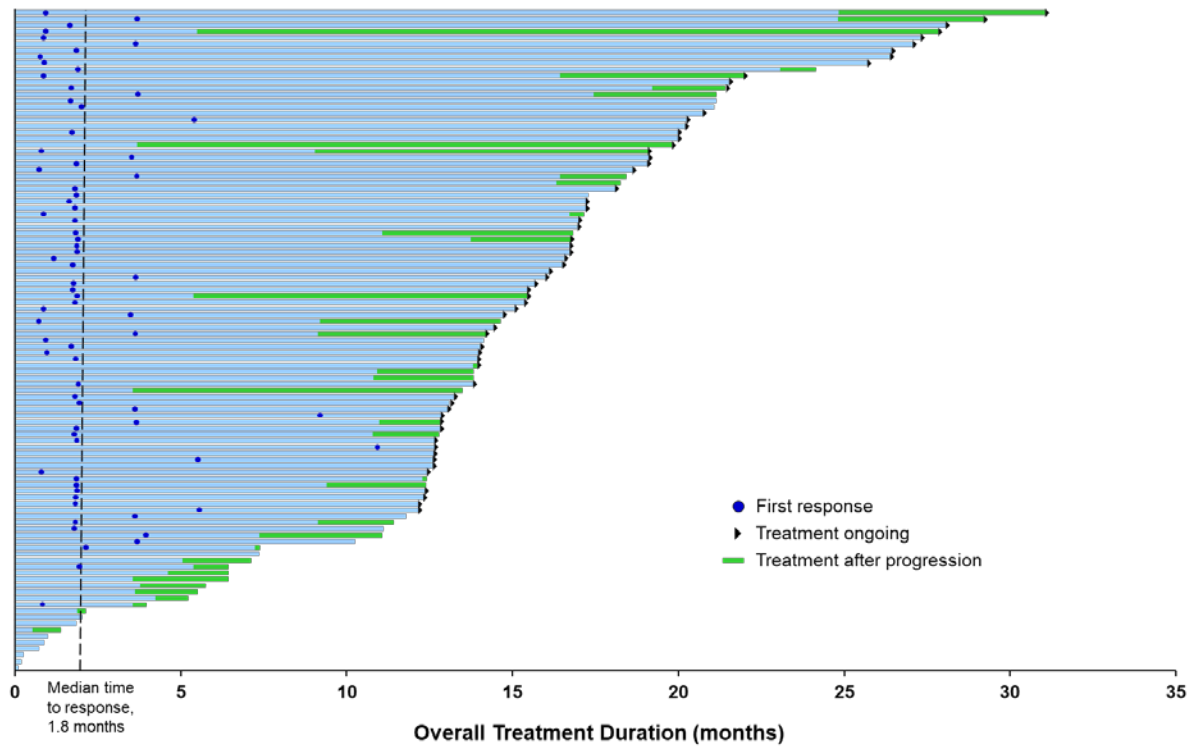

**Figure S6: Waterfall Plot of the Maximum Change in Tumor Size in Treatment-naive Patients (n=39) by fusion partner per investigator assessment.** For each patient, the best (minimum) percent change from baseline in the sum of diameters for all target lesions is represented by a vertical bar. One patient discontinued treatment prior to any post-baseline imaging assessment and is not shown in the waterfall plot.

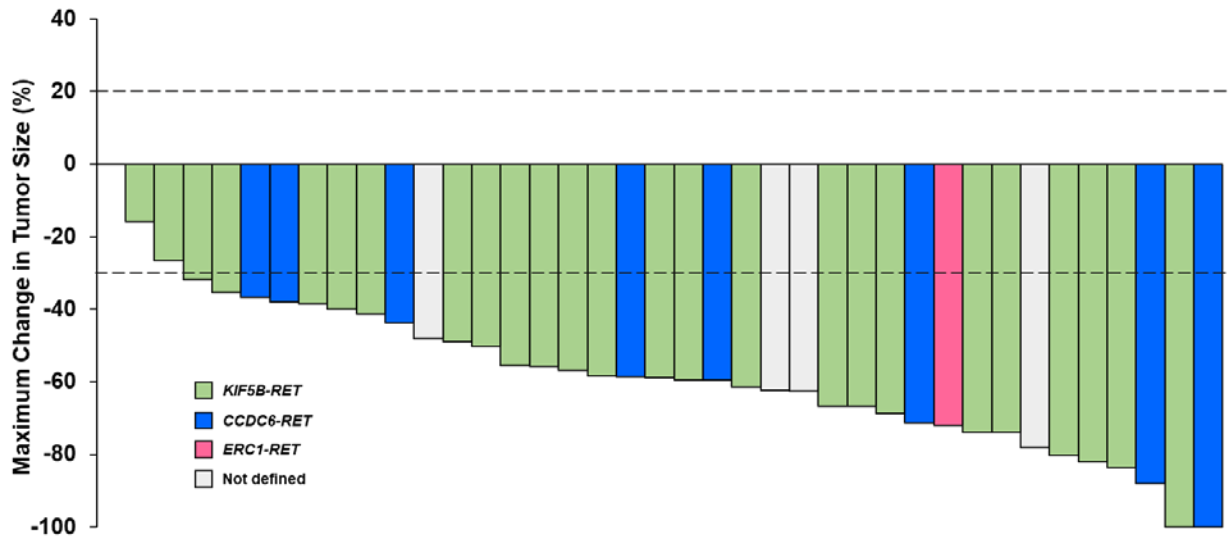



| <b>Table S1: LIBRETTO–001 patient enrollment</b> |                                                 |                                      |                                                         |                              |
|--------------------------------------------------|-------------------------------------------------|--------------------------------------|---------------------------------------------------------|------------------------------|
| <b>Country (number of sites)</b>                 | <b><i>RET</i> Fusion-positive NSCLC (n=253)</b> | <b><i>RET</i>-mutant MTC (n=226)</b> | <b><i>RET</i> Fusion-positive thyroid cancer (n=27)</b> | <b>Other cancers* (n=25)</b> |
| United States (32)                               | 138                                             | 165                                  | 25                                                      | 19                           |
| France (5)                                       | 13                                              | 26                                   | 0                                                       | 0                            |
| Japan (11)                                       | 32                                              | 0                                    | 0                                                       | 2                            |
| Australia (2)                                    | 3                                               | 26                                   | 1                                                       | 0                            |
| South Korea (5)                                  | 23                                              | 0                                    | 0                                                       | 0                            |
| Singapore (1)                                    | 13                                              | 2                                    | 0                                                       | 0                            |
| Switzerland (1)                                  | 8                                               | 4                                    | 0                                                       | 1                            |
| Hong Kong (1)                                    | 9                                               | 0                                    | 1                                                       | 0                            |
| Spain (3)                                        | 7                                               | 2                                    | 0                                                       | 3                            |
| Israel (2)                                       | 5                                               | 1                                    | 0                                                       | 0                            |
| Denmark (1)                                      | 1                                               | 0                                    | 0                                                       | 0                            |
| Italy (1)                                        | 1                                               | 0                                    | 0                                                       | 0                            |

\*Includes other *RET*-altered cancers or *RET* alteration unknown/negative

**Table S2: Local diagnostic assays used to detect RET alterations in NSCLC patients (n=144) enrolled in LIBRETTO–001**

| Laboratory                                      | Test Name                                                  | n (%)   |
|-------------------------------------------------|------------------------------------------------------------|---------|
| Assistance Publique des Hopitaux de Paris       | Somatic lung NGS RNA panel                                 | 1 (1)   |
| Basel University Hospital                       | Oncomine Fusion Panel                                      | 2 (1)   |
| Beijing Genome Institute                        | Oseq                                                       | 2 (1)   |
| Brigham and Womens Hospital                     | Oncopanel                                                  | 4 (3)   |
| Brigham and Womens Hospital                     | RET FISH                                                   | 1 (1)   |
| Burning Rock Dx                                 | Burning Rock Langqing Test                                 | 1 (1)   |
| Burning Rock Dx                                 | Oncoscreen Plus                                            | 1 (1)   |
| Centre Hospitalier Universitaire de Nimes       | Oncomine NGS panel                                         | 1 (1)   |
| Columbia University Medical Center              | Columbia Targeted Fusion Panel                             | 1 (1)   |
| Foundation Medicine                             | Foundation T5a                                             | 2 (1)   |
| Foundation Medicine                             | FoundationAct                                              | 2 (1)   |
| Foundation Medicine                             | FoundationOne                                              | 25 (17) |
| Foundation Medicine                             | FoundationOne CDx                                          | 9 (6)   |
| Geneseeq                                        | Geneseeq One                                               | 1 (1)   |
| Genomics for Life                               | Somatic DNA Targeted Sequencing Panel TSP22 and RNA Fusion | 1 (1)   |
| Guardant Health                                 | Guardant360                                                | 13 (9)  |
| Guardant Health                                 | Not provided                                               | 1 (1)   |
| Gustave Roussy                                  | Gustave Roussy NGS                                         | 1 (1)   |
| Gustave Roussy                                  | Oncomine Comprehensive Assay v3                            | 1 (1)   |
| Gustave Roussy                                  | RET FISH                                                   | 1 (1)   |
| HaploX                                          | HapOnco 451 Gene Detection                                 | 1 (1)   |
| Hong Kong Molecular Pathology Diagnostic Centre | RET FISH                                                   | 1 (1)   |
| Hopitaux Universitaires Paris Centre            | RET FISH                                                   | 1 (1)   |
| Ignyta                                          | Trailblaze Pharos                                          | 2 (1)   |
| Institute for Haemopathology Hamburg            | NEOselect                                                  | 1 (1)   |
| Instituto Nazionale dei Tumori                  | FusionPlex Lung Panel                                      | 1 (1)   |
| Laboratorio de Dianas Terapeuticas              | Oncomine Focus Assay                                       | 1 (1)   |
| MD Anderson Cancer Center                       | RET FISH                                                   | 1 (1)   |
| MD Anderson Cancer Center                       | Solid Tumor Genomic Assay 2018                             | 2 (1)   |
| Macrogen                                        | Axen Cancer Panel 2                                        | 1 (1)   |
| Massachusetts General Hospital                  | RET FISH                                                   | 1 (1)   |
| Massachusetts General Hospital                  | Solid fusion assay                                         | 2 (1)   |
| Mayo Clinic Laboratories                        | Lung Panel Rearrangement Tumor                             | 2 (1)   |
| Mayo Medical Laboratory                         | RET FISH                                                   | 1 (1)   |
| Memorial Sloan Kettering Cancer Center          | FusionPlex Custom Solid Panel                              | 2 (1)   |
| Memorial Sloan Kettering Cancer Center          | MSK IMPACT                                                 | 12 (8)  |
| NYU Langone Hospitals                           | Oncomine Focus Assay                                       | 1 (1)   |
| Neo New Oncology                                | NEOliquid                                                  | 1 (1)   |
| OncoDNA                                         | OncoDeep                                                   | 1 (1)   |
| Paradigm                                        | FusionPlex Solid Tumor Panel                               | 2 (1)   |
| Pathgroup Oncology                              | RET FISH                                                   | 1 (1)   |
| Pathline Emerge                                 | RET FISH                                                   | 1 (1)   |
| Resolution Bioscience                           | Resolution ctDx Lung Assay                                 | 1 (1)   |

|                                                                |                                              |       |
|----------------------------------------------------------------|----------------------------------------------|-------|
| SRL                                                            | Oncomine Cancer Panel                        | 5 (3) |
| SRL                                                            | Oncomine Comprehensive Assay v3              | 4 (3) |
| SRL                                                            | RET FISH                                     | 1 (1) |
| SRL                                                            | RET RTPCR                                    | 2 (1) |
| Samsung Biomedical Research Institute                          | Not provided                                 | 3 (2) |
| Samsung Genome Institute                                       | CancerSCAN                                   | 2 (1) |
| Sema4                                                          | Sema4 Solid Tumor Panel                      | 1 (1) |
| Seoul National University Bundang Hospital                     | SNUBH Pan cancer test                        | 3 (2) |
| Severance Hospital                                             | TST170                                       | 1 (1) |
| Strata Oncology                                                | StrataNGS                                    | 2 (1) |
| UC San Diego Health System                                     | Comprehensive NGS Solid Tumor Mutation Panel | 1 (1) |
| University Hospital                                            | Focused Solid Tumor Assay                    | 1 (1) |
| University of Bern Institute of Pathology                      | Oncomine Focus Assay                         | 1 (1) |
| University of Pennsylvania Center for Personalized Diagnostics | Solid Tumor Genomic Sequencing Panel         | 1 (1) |
| University of Pennsylvania Cytogenetics Laboratory             | RET FISH                                     | 1 (1) |
| University of Vermont Medical Center                           | Gene Panel NSCLC                             | 1 (1) |
| University of Virginia Health System                           | RET FISH                                     | 1 (1) |
| Yale Pathology Laboratories                                    | Oncomine Gene Panel                          | 1 (1) |
| Zurich University Hospital                                     | Oncomine Focus Assay                         | 1 (1) |

**Table S3. Best Overall Response in Platinum Pretreated Patients by Prior Anti-PD-1 or Anti-PD-L1 Therapy**

| Response                             | Independent Review              |                                 |
|--------------------------------------|---------------------------------|---------------------------------|
|                                      | Prior Anti-PD-1/PD-L1<br>(n=58) | Anti-PD-1/PD-L1 Naïve<br>(n=47) |
| Objective response rate (95% CI) – % | 66 (52-78)                      | 62 (46-76)                      |
| Best response – no. %                |                                 |                                 |
| Complete response                    | 1 (2)                           | 1 (2)                           |
| Partial response                     | 37 (64)                         | 28 (60)                         |
| Stable disease                       | 13 (22)                         | 17 (36)                         |
| Progressive disease                  | 3 (5)                           | 1 (2)                           |
| Not evaluable                        | 4 (7)                           | 0                               |
| Duration of response                 |                                 |                                 |
| Median, months (95% CI)              | NE (12-NE)                      | 17.5 (10.3-NE)                  |
| Median follow-up, months             | 11.9                            | 12.7                            |

**Table S4. Best Overall Response in Platinum Pretreated Patients by Prior Multikinase Inhibitors (MKI)**

| Response                             | Independent Review  |                     |
|--------------------------------------|---------------------|---------------------|
|                                      | Prior MKI<br>(n=50) | MKI Naïve<br>(n=55) |
| Objective response rate (95% CI) – % | 64 (49-77)          | 64 (50-76)          |
| Best response – no. %                |                     |                     |
| Complete response                    | 2 (4)               | 0                   |
| Partial response                     | 30 (60)             | 35 (64)             |
| Stable disease                       | 13 (26)             | 17 (31)             |
| Progressive disease                  | 3 (6)               | 1 (2)               |
| Not evaluable                        | 2 (4)               | 2 (4)               |
| Duration of response                 |                     |                     |
| Median, months (95% CI)              | NE (12-NE)          | 17.5 (12-NE)        |
| Median follow-up, months             | 12.7                | 12.0                |

| <b>Table S5: Adverse Events in All Selpercatinib Treated Patients (N=531)</b> |                                                  |                |                |                |                  |                                         |                |                  |
|-------------------------------------------------------------------------------|--------------------------------------------------|----------------|----------------|----------------|------------------|-----------------------------------------|----------------|------------------|
| <b>Adverse Event</b>                                                          | <b>Adverse Events, Regardless of Attribution</b> |                |                |                |                  | <b>Treatment-Related Adverse Events</b> |                |                  |
|                                                                               | <i>Percent of patients with event</i>            |                |                |                |                  |                                         |                |                  |
|                                                                               | <b>Grade 1</b>                                   | <b>Grade 2</b> | <b>Grade 3</b> | <b>Grade 4</b> | <b>Any Grade</b> | <b>Grade 3</b>                          | <b>Grade 4</b> | <b>Any Grade</b> |
| Diarrhea                                                                      | 145 (27)                                         | 48 (9)         | 20 (4)         | 0              | 213 (40)         | 9 (2)                                   | 0              | 114 (22)         |
| Dry mouth                                                                     | 177 (33)                                         | 25 (5)         | 0              | 0              | 202 (38)         | 0                                       | 0              | 174 (33)         |
| Hypertension                                                                  | 22 (4)                                           | 75 (14)        | 92 (17)        | 1 (<1)         | 190 (36)         | 56 (11)                                 | 1 (<1)         | 128 (24)         |
| Aspartate aminotransferase increased                                          | 100 (19)                                         | 29 (6)         | 36 (7)         | 5 (1)          | 170 (32)         | 27 (5)                                  | 4 (1)          | 136 (26)         |
| Fatigue                                                                       | 96 (18)                                          | 60 (11)        | 5 (1)          | 0              | 161 (30)         | 2 (<1)                                  | 0              | 96 (18)          |
| Alanine aminotransferase increased                                            | 80 (15)                                          | 25 (5)         | 47 (9)         | 6 (1)          | 158 (30)         | 38 (7)                                  | 5 (1)          | 130 (25)         |
| Nausea                                                                        | 111 (21)                                         | 30 (6)         | 3 (1)          | 0              | 144 (27)         | 2 (<1)                                  | 0              | 56 (11)          |
| Constipation                                                                  | 113 (21)                                         | 25 (5)         | 3 (1)          | 0              | 141 (27)         | 1 (<1)                                  | 0              | 66 (12)          |
| Edema peripheral                                                              | 119 (22)                                         | 21 (4)         | 1 (<1)         | 0              | 141 (27)         | 0                                       | 0              | 77 (15)          |
| Headache                                                                      | 94 (18)                                          | 26 (5)         | 9 (2)          | 0              | 129 (24)         | 2 (<1)                                  | 0              | 44 (8)           |
| Blood creatinine increased                                                    | 81 (15)                                          | 27 (5)         | 0              | 1 (<1)         | 109 (21)         | 0                                       | 0              | 59 (11)          |
| Abdominal pain                                                                | 72 (14)                                          | 24 (5)         | 11 (2)         | 0              | 107 (20)         | 1 (<1)                                  | 0              | 25 (5)           |
| Rash                                                                          | 78 (15)                                          | 18 (3)         | 3 (1)          | 0              | 99 (19)          | 3 (1)                                   | 0              | 61 (12)          |
| Vomiting                                                                      | 72 (14)                                          | 21 (4)         | 2 (<1)         | 0              | 95 (18)          | 1 (<1)                                  | 0              | 25 (5)           |
| Electrocardiogram QT prolonged                                                | 26 (5)                                           | 39 (7)         | 22 (4)         | 1 (<1)         | 88 (17)          | 15 (3)                                  | 1 (<1)         | 65 (12)          |
| Cough                                                                         | 74 (14)                                          | 13 (2)         | 0              | 0              | 87 (16)          | 0                                       | 0              | 6 (1)            |
| Dyspnea                                                                       | 52 (10)                                          | 18 (3)         | 11 (2)         | 2 (<1)         | 83 (16)          | 0                                       | 0              | 7 (1)            |

\*The adverse events listed here are those that occurred at any grade in at least 15% of patients, regardless of attribution. The relatedness of adverse events to treatment was determined by the investigators. Total % for any given AE may be different than the sum of the individual grades, due to rounding. In total, 19 patients experience grade 5 adverse events including cardiac arrest (3), sepsis (3) respiratory failure (2), brain herniation, cardiac failure, cerebral hemorrhage, cerebrovascular accident, general physical health deterioration, hemoptysis, hypoxia, multiple organ dysfunction syndrome, neoplasm progression, pneumonia, and post-procedure hemorrhage (1 each), all grade 5 adverse events deemed unrelated to selpercatinib.
